# Supplementary material for: Facile preparation of yolk–shell structured Si/SiC@C@TiO2 nanocomposites as highly efficient photocatalysts for degrading organic dye in wastewater
Source: Royal Society of Chemistry journal article supplement (doi:10.1039/c5ra24643a), 2015-12-28
Supplement: c5ra24643a1.pdf [file c5ra24643a1.pdf]

## Supporting Information

### Facile preparation of yolk-shell structured Si/SiC@C@TiO<sub>2</sub> nanocomposites as highly efficient photocatalysts for degrading organic dye in wastewater

Mei-Pin Liu, Tingting Su, Lin Sun and Hong-Bin Du\*

*<sup>a</sup> State Key Laboratory of Coordination Chemistry, Collaborative Innovation Center of Chemistry for Life Sciences, School of Chemistry and Chemical Engineering, Nanjing University, Nanjing, 210093, China. E-mail: hbdu@nju.edu.cn.*

#### Experimental

**Preparation of stöber SiO<sub>2</sub> spheres.** 0.6 mL of tetraethyl orthosilicate (TEOS) was added into the mixed solution of isopropyl alcohol (64 mL) and deionized water (26 mL). 1.3 mL of 30% ammonium solution was added into the above solution, followed by stirring for 1 h. Then 5 mL of TEOS were added dropwise into the solution at 35 °C for 2h. After centrifugation, the white solid was washed several times with water and ethanol, then collected and dried under vacuum at 70 °C.

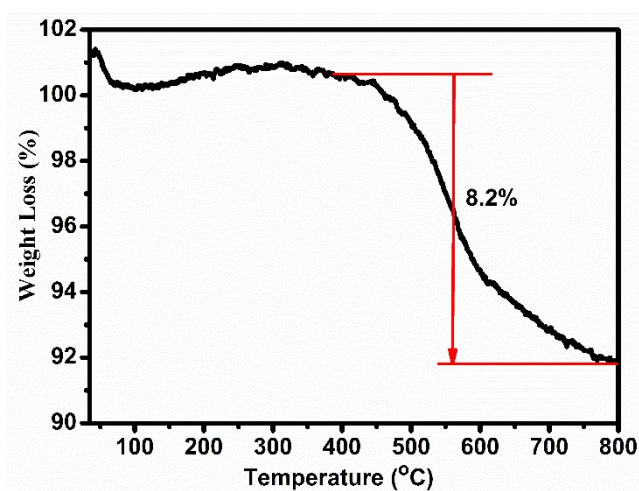

Fig. S1 TGA curve of YSSC spheres

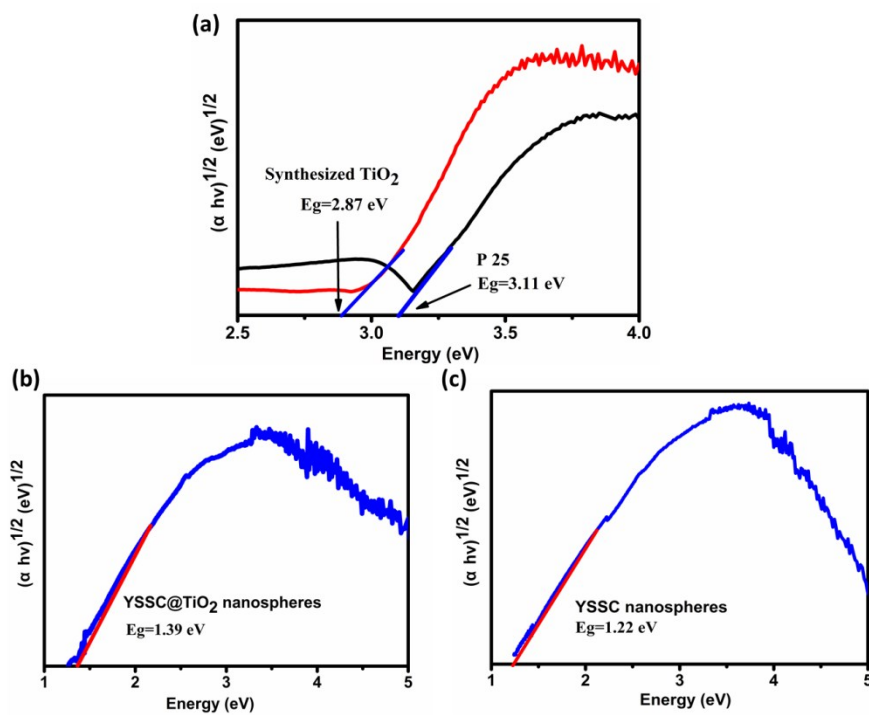

**Fig. S2** Plots of  $(\alpha hv)^{1/2}$  vs  $(hv)$  based on UV-Vis diffuse reflectance spectra

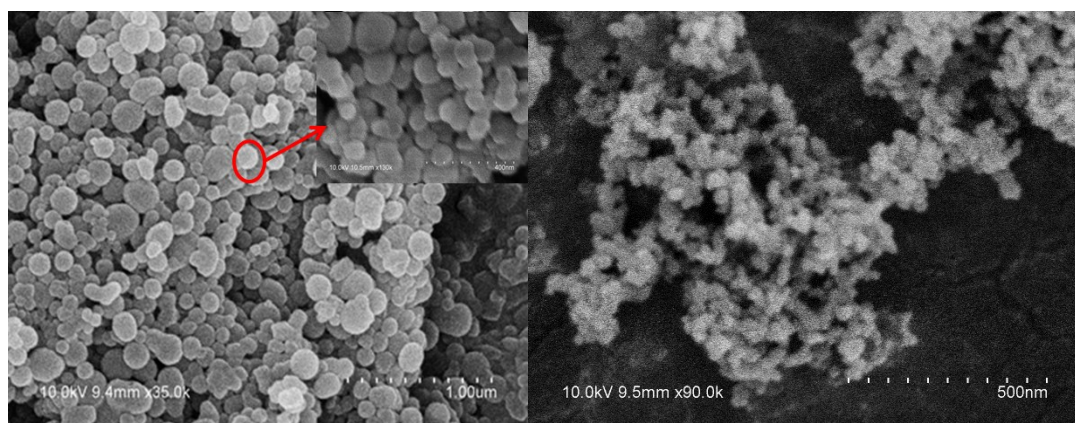

**Fig S3.** SEM images of synthesized  $\text{TiO}_2$  (left, ~400 nm nanospheres formed by 60 nm nanobeans), and P25 (right, 80~100 nm nanoparticles)

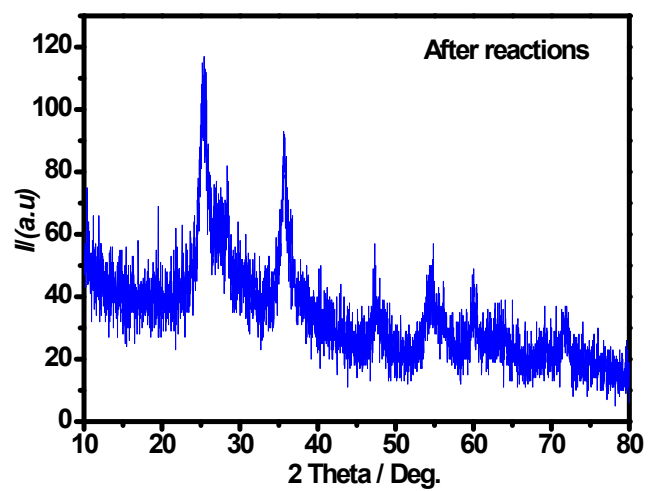

**Fig. S4** XRD pattern of YSSC@TiO<sub>2</sub> spheres after catalytic reactions

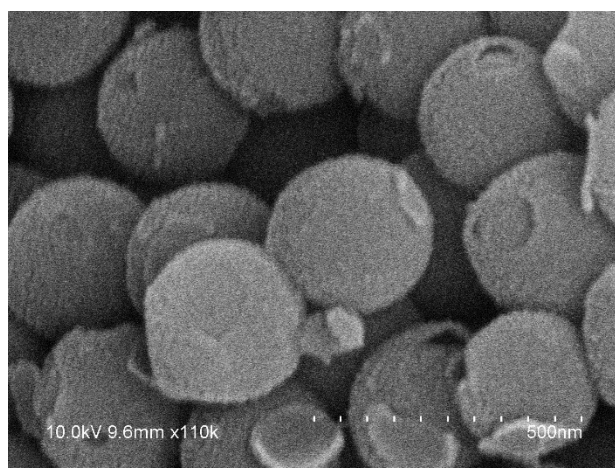

**Fig. S5** SEM image of YSSC@TiO<sub>2</sub> spheres after catalytic reactions.

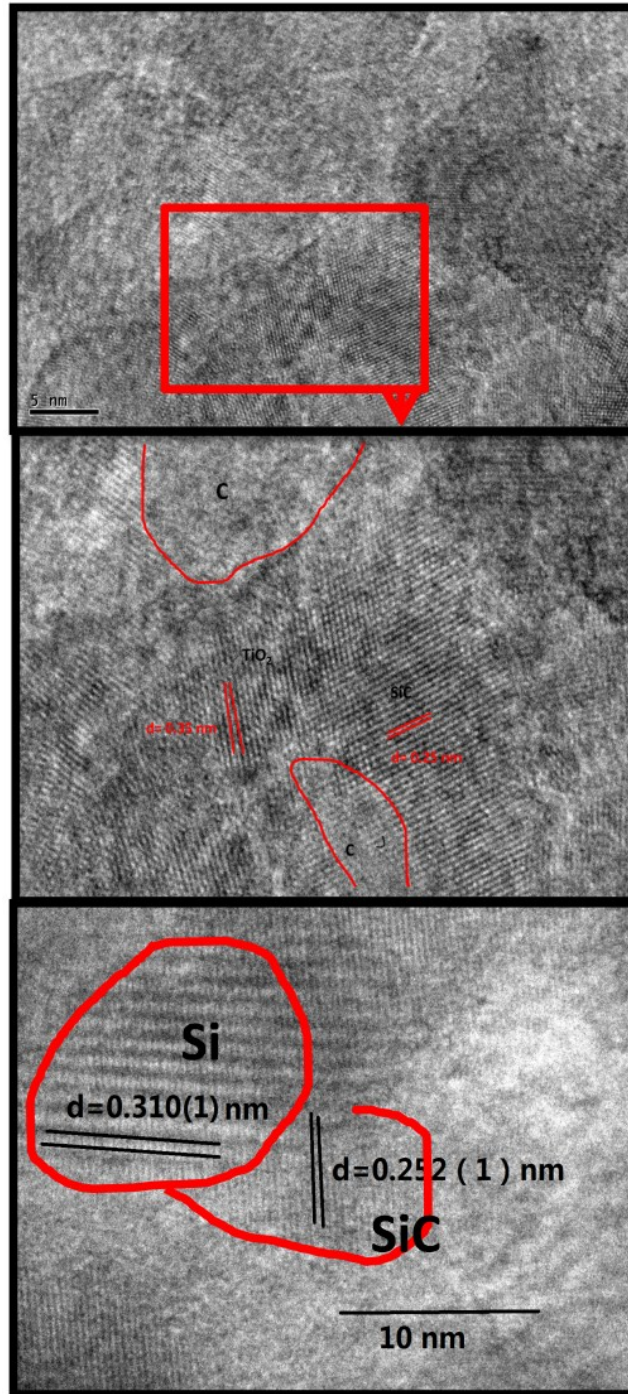

**Fig. S6** TEM image of YSSC@TiO<sub>2</sub>, showing the co-existence of TiO<sub>2</sub>, C, SiC and Si.
